# Supplementary material
Source: PubMed Central journal article supplement (PMC7117929)
Supplement: AEM.02846-19-s0001.pdf [file AEM.02846-19-s0001.pdf]

1 **Supplemental materials**

2 **Table S1.** Total numbers of raw and effective sequences, OTU (operational taxonomic unit)  
 3 counts and Good's coverage in each tested layer of the Kam Kotia Mine NIT profile at four  
 4 different locations (Site 1, 3, 4 and 5), as determined by high-throughput amplicon sequencing.

| Site    | Soil sample  | Total raw sequences | Effective sequences for analysis | OTU counts | Good's coverage |
|---------|--------------|---------------------|----------------------------------|------------|-----------------|
| 1       | soil         | 148,178             | 101,006                          | 2,725      | 0.938           |
|         | sand         | 130,678             | 100,556                          | 2,306      | 0.957           |
|         | clay         | 181,464             | 146,547                          | 1,391      | 0.972           |
|         | cushion sand | 206,340             | 159,922                          | 1,229      | 0.975           |
|         | rock         | 212,867             | 177,480                          | 481        | 0.989           |
|         | tailings     | 309,508             | 260,002                          | 434        | 0.992           |
|         |              | 439,041             | 383,915                          | 326        | 0.993           |
|         |              | 284,231             | 239,249                          | 381        | 0.992           |
|         |              | 249,384             | 203,543                          | 545        | 0.989           |
|         |              | 385,551             | 324,406                          | 683        | 0.988           |
| 267,878 |              | 231,617             | 509                              | 0.992      |                 |
| 3       | soil         | 185,267             | 136,692                          | 2,458      | 0.943           |
|         | sand         | 188,633             | 154,522                          | 1,581      | 0.980           |
|         | clay         | 181,466             | 147,377                          | 2,466      | 0.965           |
|         | cushion sand | 303,908             | 247,134                          | 1,928      | 0.970           |
|         | rock         | 255,407             | 195,348                          | 975        | 0.977           |
|         | tailings     | 88,667              | 75,552                           | 481        | 0.996           |
|         |              | 37,176              | 32,817                           | 225        | 0.997           |
|         |              | 205,889             | 175,984                          | 1,367      | 0.978           |
| 178,999 |              | 158,967             | 729                              | 0.994      |                 |
| 4       | soil         | 180,296             | 129,448                          | 2,642      | 0.942           |
|         | sand         | 210,021             | 165,248                          | 2,449      | 0.955           |
|         | clay         | 170,360             | 145,565                          | 1,113      | 0.976           |
|         | cushion sand | 273,237             | 214,533                          | 1,556      | 0.968           |
|         | rock         | 203,340             | 159,079                          | 515        | 0.990           |
|         | tailings     | 32,576              | 24,652                           | 113        | 0.998           |
|         |              | 71,596              | 64,786                           | 134        | 0.998           |
| 156,773 |              | 136,372             | 454                              | 0.996      |                 |
| 5       | soil         | 115,576             | 82,329                           | 2,884      | 0.940           |
|         | sand         | 187,709             | 156,580                          | 1,200      | 0.988           |
|         | clay         | 62,592              | 55,181                           | 374        | 0.996           |

|  |              |         |         |       |       |
|--|--------------|---------|---------|-------|-------|
|  | cushion sand | 296,958 | 230,846 | 1,929 | 0.959 |
|  | rock         | 261,873 | 200,930 | 898   | 0.981 |
|  | tailings     | 79,563  | 68,132  | 159   | 0.998 |
|  |              | 170,801 | 145,536 | 355   | 0.997 |
|  |              | 53,564  | 42,068  | 284   | 0.997 |

5

6 **Table S2.** Mean proportions of total reads of major prokaryotic genera (accounting for > 0.5% of  
7 total amplicons), and sum of minor genera (< 0.5%), determined in Kam Kotia Mine NIT samples.  
8 Higher taxa that could not be identified on the genus level are marked with asterisks.

| Genus                                  | Mean % of total reads |          |
|----------------------------------------|-----------------------|----------|
|                                        | Cover system          | Tailings |
| Sum of minor genera                    | 67.3                  | 74.1     |
| <i>Bacteria</i> *                      | 5.1                   | 4.2      |
| <i>Burkholderiaceae</i> *              | 4.1                   | 2.4      |
| <i>Betaproteobacteriales</i> *         | 2.8                   | 0.3      |
| <i>Subgroup_6_ge</i>                   | 3.2                   | 1.2      |
| <i>Gammaproteobacteria</i> *           | 1.1                   | 0.4      |
| <i>Alphaproteobacteria</i> *           | 0.9                   | 0.4      |
| <i>Sphingomonadaceae</i> *             | 0.9                   | 0.3      |
| <i>Rhizobiales</i> *                   | 0.8                   | 0.3      |
| <i>Parcubacteria</i> *                 | 0.7                   | 1.5      |
| <i>uncultured</i>                      | 1.0                   | 0.3      |
| <i>Chitinophagaceae</i> *              | 0.7                   | 0.1      |
| <i>uncultured</i>                      | 1.5                   | 0.8      |
| <i>Proteobacteria</i> *                | 0.4                   | 0.9      |
| <i>Acidobacteriaceae_(Subgroup_1)*</i> | 0.1                   | 1.9      |
| <i>KD4-96_ge</i>                       | 1.2                   | 0.8      |
| <i>AD3_ge</i>                          | 0.5                   | 1.4      |
| <i>Xanthobacteraceae</i> *             | 0.9                   | 0.8      |
| <i>Acidimicrobiia</i> *                | 0.4                   | 0.9      |
| <i>Flavobacterium</i>                  | 0.9                   | 1.0      |
| <i>uncultured</i>                      | 0.1                   | 1.6      |
| <i>Deltaproteobacteria</i> *           | 0.6                   | 0.5      |
| <i>Chloroflexi</i> *                   | 0.6                   | 0.2      |
| <i>Subgroup_7_ge</i>                   | 1.3                   | 0.2      |
| <i>Micrococcaceae</i> *                | 0.6                   | 1.1      |
| <i>Actinobacteria</i> *                | 0.3                   | 0.5      |
| <i>Pedosphaeraceae_ge</i>              | 0.6                   | 0.3      |
| <i>Myxococcales</i> *                  | 0.5                   | 0.1      |
| <i>Sphingobacteriaceae</i> *           | 0.4                   | 0.1      |
| <i>Babeliales</i> *                    | 0.3                   | 0.5      |
| <i>BSV13</i>                           | 0.2                   | 1.0      |

9

10 **Table S3:** Permutation test for homogeneity of multivariate dispersions of a 3D-NMDS plot of  
11 Bray-Curtis similarity matrices of microbial communities at the four Kam Kotia Mine NIT sampling  
12 sites (shown in Fig. S1). Pairwise comparisons: observed p-values below diagonal, permuted p-  
13 value above diagonal.

| Site | 1       | 3       | 4       | 5      |
|------|---------|---------|---------|--------|
| 1    | -       | 0.13387 | 0.43856 | 0.3147 |
| 3    | 0.14870 | -       | 0.65035 | 0.7153 |
| 4    | 0.42071 | 0.62835 | -       | 0.8921 |
| 5    | 0.29546 | 0.73918 | 0.87550 | -      |

14

15 **Table S4:** Results of the pairwise PERMANOVA for 3D-NMDS plot of Bray-Curtis similarity  
16 matrices of microbial communities at the four Kam Kotia Mine NIT sampling sites (shown in Fig.  
17 S1). P-value adjustment method: fdr.

| <b>Site</b> | <b>1</b> | <b>3</b> | <b>4</b> |
|-------------|----------|----------|----------|
| 3           | 0.13     | -        | -        |
| 4           | 0.13     | 0.92     | -        |
| 5           | 0.13     | 0.82     | 0.92     |

18

19 **Table S5:** Permutation test for homogeneity of multivariate dispersions of Bray-  
 20 Curtis similarity matrices of microbial communities in different layers of the Kam Kotia Mine NIT  
 21 profile (shown in Fig. 2). Pairwise comparisons: observed p-values below diagonal, permuted p-  
 22 value above diagonal.

| Layer        | Clay     | Cushion sand | Rock     | Sand     | Soil     | Tailings |
|--------------|----------|--------------|----------|----------|----------|----------|
| Clay         | -        | 0.0450       | 0.8402   | 0.5295   | 0.2727   | 0.001    |
| Cushion sand | 0.0317   | -            | 0.0639   | 0.1798   | 0.2378   | 0.001    |
| Rock         | 0.8511   | 0.0504       | -        | 0.4486   | 0.2697   | 0.001    |
| Sand         | 0.5451   | 0.1504       | 0.4817   | -        | 0.6284   | 0.001    |
| Soil         | 0.2820   | 0.2429       | 0.2697   | 0.6740   | -        | 0.001    |
| Tailings     | 3.03E-06 | 1.80E-10     | 2.64E-05 | 5.74E-07 | 4.71E-08 | -        |

23

24

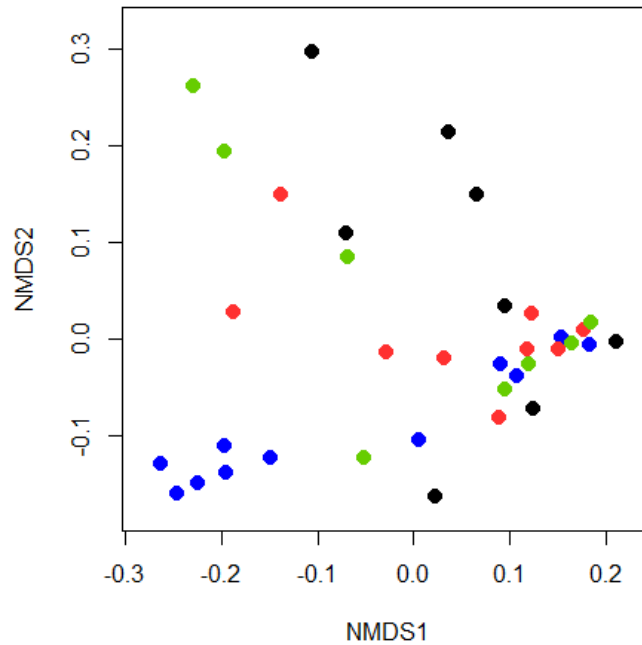

25

26 **Fig. S1.** Two-dimensional non-metric multidimensional scaling (2D-NMDS, stress = 0.116) plot of  
 27 Bray-Curtis similarity matrices of microbial communities at NIT Site (●) 1, (●) 3, (●) 4, and (●) 5  
 28 at the Kam Kotia Mine. Points represent the composition of a community, and the distance  
 29 between any two points represents the difference between those two communities.
